# Supplementary material for: FHND004 inhibits malignant proliferation of multiple myeloma by targeting PDZ-binding kinase in MAPK pathway
Source: publisher site journal article supplement (doi:10.18632/aging.205634), 2024-03-07
Supplement: Supplementary file [file aging-v16i5-205634-supplementary-material-SD1.pdf]

SUPPLEMENTARY FIGURES

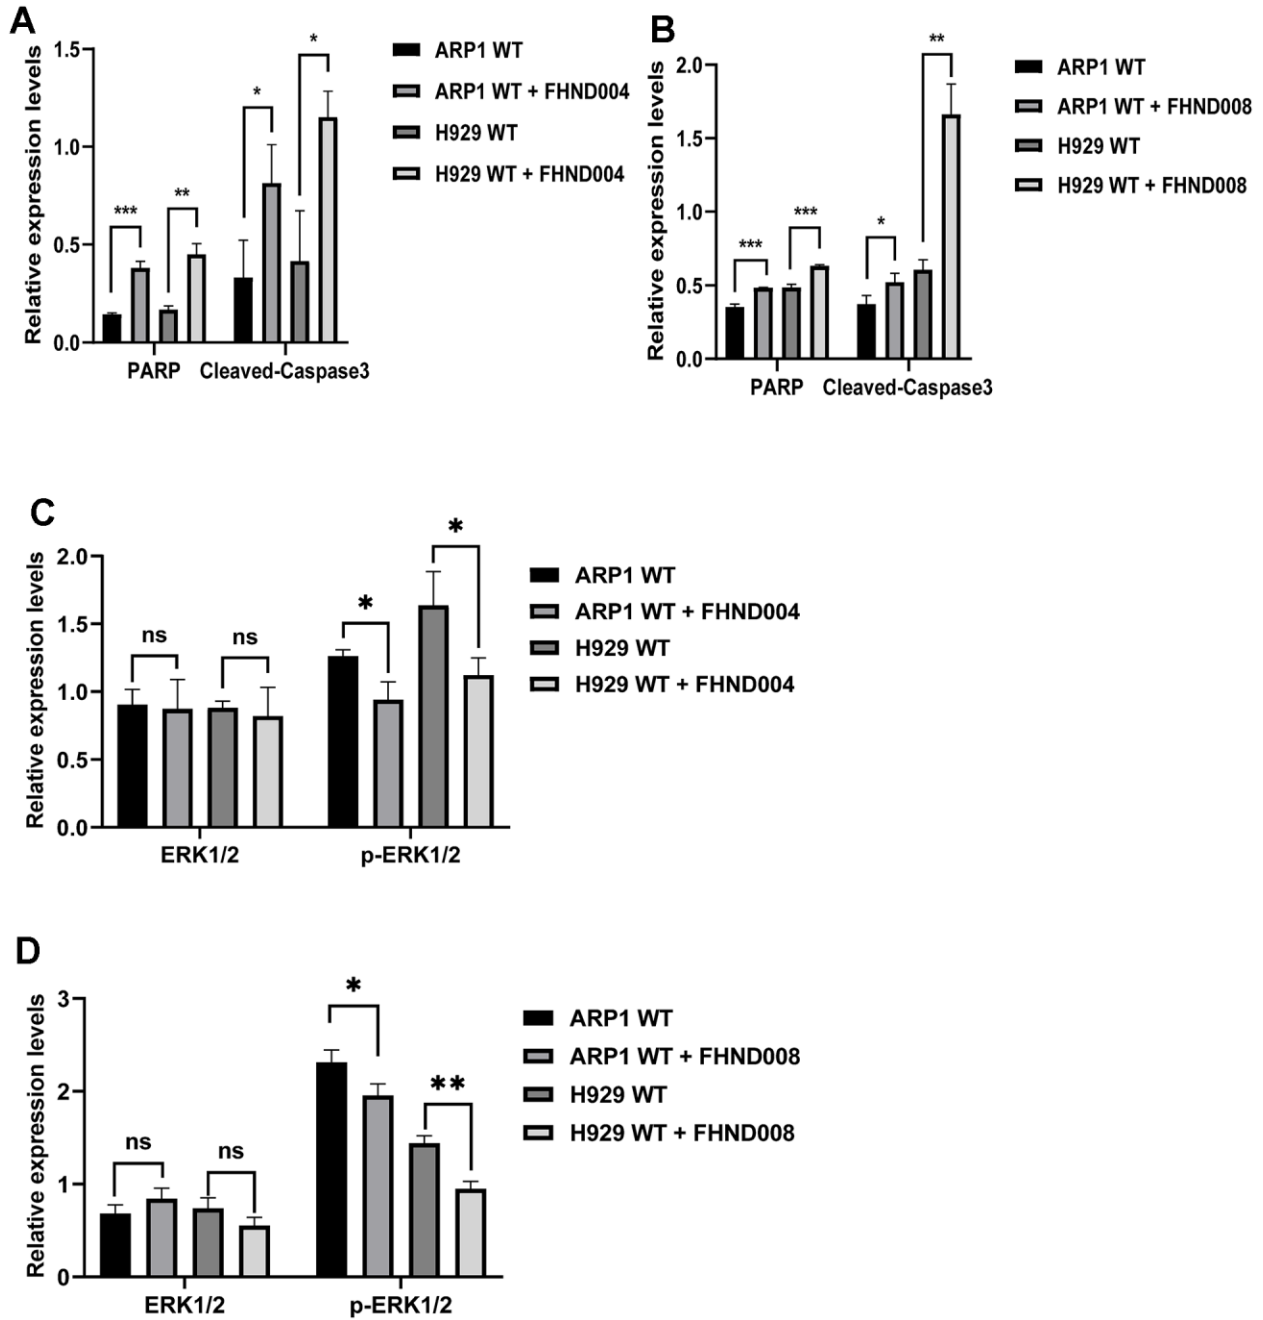

**Supplementary Figure 1. Quantitative analysis of WB results.** (A, B) Relative expression of PARP and Cleaved Caspase-3 in ARP1 WT, H929 WT with or without treatment of FHND004 (4  $\mu$ M) (A) and FHND008 (4  $\mu$ M) (B). (C, D) Relative expression of ERK, p-ERK in ARP1 WT and H929 WT cells with or without treatment of FHND004 (4  $\mu$ M) (C) and FHND008 (4  $\mu$ M) (D). The data are expressed as mean  $\pm$  SD. (\* $p$  < 0.05; \*\* $p$  < 0.01; \*\*\* $p$  < 0.001). Related to Figures 1F, 1G, 2D, 2E in the manuscript.

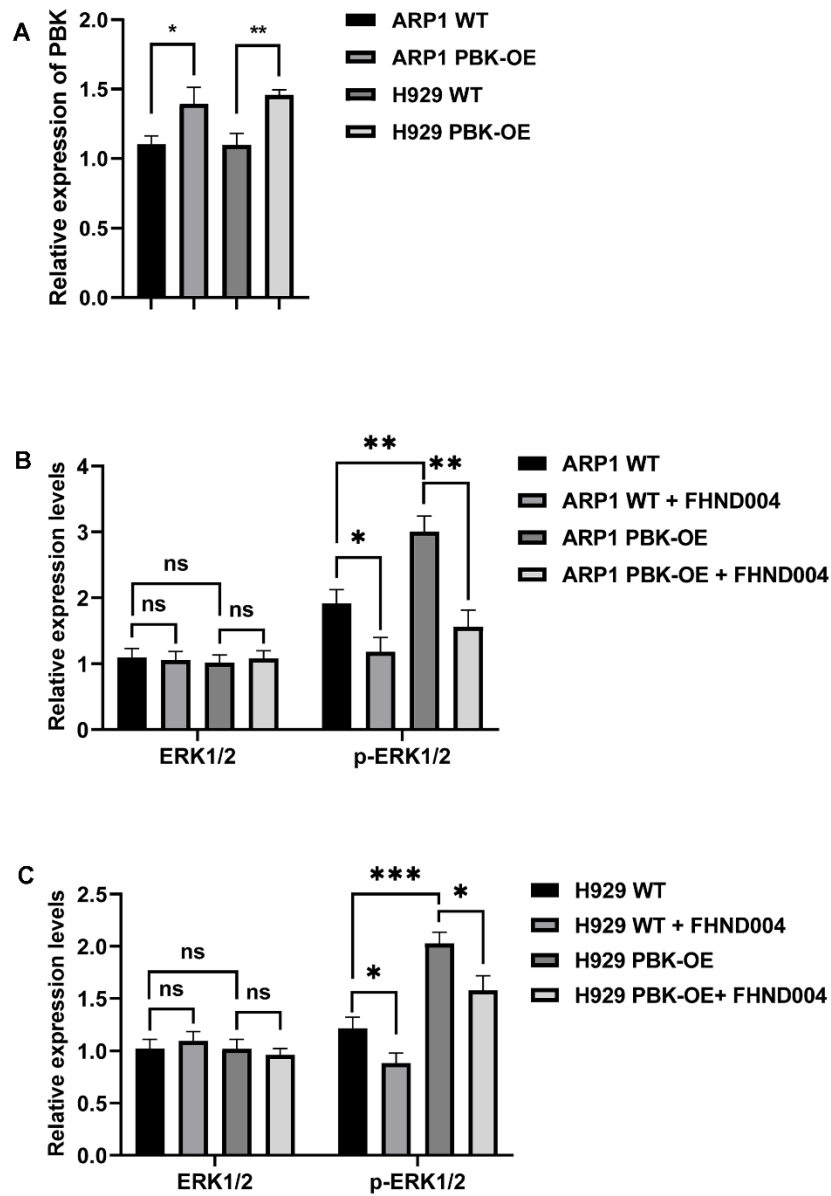

**Supplementary Figure 2. Quantitative analysis of WB results.** (A) Relative expression of PBK in ARP1 and H929 WT and PBK-OE cells. (B, C) Relative expression of ERK, p-ERK in PBK-WT and PBK-OE cells with or without treatment of FHND004 (4  $\mu$ M) (A: ARP1, B: H929). The data are expressed as mean  $\pm$  SD. (\* $p$  < 0.05; \*\* $p$  < 0.01; \*\*\* $p$  < 0.001). Related to Figures 6A, 7A, 7B in the manuscript.
