# Supplementary material for: FHND004 inhibits malignant proliferation of multiple myeloma by targeting PDZ-binding kinase in MAPK pathway
Source: publisher site journal article supplement (doi:10.18632/aging.205634), 2024-03-07
Supplement: Supplementary file [file aging-v16i5-205634-supplementary-material-SD2.pdf]

## SUPPLEMENTARY TABLES

**Supplementary Table 1. The effects of FHND drugs on cell viability of MM cells.**

| FHND drugs         | ARP1 WT | H929 WT |
|--------------------|---------|---------|
| FHND002 ( $\mu$ M) | 7.98    | 15.84   |
| FHND004 ( $\mu$ M) | 3.95    | 2.84    |
| FHND006 ( $\mu$ M) | 10.77   | /       |
| FHND007 ( $\mu$ M) | /       | 40.64   |
| FHND008 ( $\mu$ M) | 5.68    | /       |
| FHND009 ( $\mu$ M) | 16.52   | 18.59   |

**Supplementary Table 2. Potential proteins interacting with FHND008 based on HuProt™ human proteomic chip V4.0.**

| Block | Column | Row | Name    | ID                 | SNR-biotin         | SNR-FHND008        | Normalization-biotin | Normalization-FHND008-biotin | Fold change      |
|-------|--------|-----|---------|--------------------|--------------------|--------------------|----------------------|------------------------------|------------------|
| 9     | 15     | 57  | MYLK    | JHU14956.B9C15R57  | 1.8683333333333333 | 3.52971428571429   | 1.8683333333333333   | 6.06282849990836             | 3.24504647631134 |
| 1     | 25     | 19  | GDPD5   | JHU01374.B1C25R19  | 2.51282051282051   | 3.49350259896042   | 2.51282051282051     | 6.00062934476153             | 2.38800555556836 |
| 1     | 29     | 47  | GADD45G | JHU02812.B1C29R47  | 2.29787234042553   | 2.62281976744186   | 2.29787234042553     | 4.50509733904754             | 1.96055161977069 |
| 14    | 23     | 73  | CYAT1   | JHU15234.B14C23R73 | 2.80876068376068   | 2.47417582417582   | 2.80876068376068     | 4.24977844844512             | 1.51304398164497 |
| 11    | 23     | 85  | TCEB2   | JHU03155.B11C23R85 | 2.17142857142857   | 2.3388333333333333 | 2.17142857142857     | 4.0173068532088              | 1.85007552450405 |
| 3     | 25     | 25  | MARC2   | JHU01787.B3C25R25  | 1.96332046332046   | 2.30470822281167   | 1.96332046332046     | 3.95869171445079             | 2.01632478671142 |
| 8     | 27     | 51  | PPM1G   | JHU08990.B8C27R51  | 2.47794117647059   | 2.1789825282631    | 2.47794117647059     | 3.74273844957469             | 1.51042263840403 |
| 11    | 9      | 27  | DOHH    | JHU13137.B11C9R27  | 2.28323170731707   | 2.05241935483871   | 2.28323170731707     | 3.52534668560619             | 1.54401617422731 |
| 7     | 8      | 47  | ACAA1   | JHU08544.B7C8R47   | 2.20482261640798   | 1.9347024256064    | 2.20482261640798     | 3.32314970995865             | 1.50721862395107 |
| 2     | 3      | 87  | SNX15   | JHU05453.B2C3R87   | 1.87               | 1.92758291577189   | 1.87                 | 3.31092085412611             | 1.77054591129739 |
| 6     | 8      | 27  | PBK     | JHU07458.B6C8R27   | 1.75295508274232   | 1.824              | 1.75295508274232     | 3.13300122579043             | 1.78726839987775 |
| 13    | 1      | 75  | FABP5   | JHU00992.B13C1R75  | 1.57619047619048   | 1.79357394366197   | 1.57619047619048     | 3.08073978291597             | 1.95454789852675 |
| 16    | 6      | 53  | CCDC117 | JHU18658.B16C6R53  | 1.96150362318841   | 1.79356805664831   | 1.96150362318841     | 3.08072967106234             | 1.57059596252728 |
| 5     | 3      | 33  | IGLC2   | JHU07717.B5C3R33   | 1.5155255395125    | 1.77923976608187   | 1.5155255395125      | 3.05611862286709             | 2.01654049581386 |

SNR, Signal-to-noise Ratio.
